# Supplementary material for: Polyacrylic-Co-Maleic-Acid-Coated Magnetite Nanoparticles for Enhanced Removal of Heavy Metals from Aqueous Solutions
Source: MDPI journal article supplement (doi:10.3390/colloids7010005), 2023-01-12
Supplement: s1 [file s1]

Archive with 1 entries (1 files):
- colloids-2074184-supplementary.pdf
