# Supplementary material for: Polyacrylic-Co-Maleic-Acid-Coated Magnetite Nanoparticles for Enhanced Removal of Heavy Metals from Aqueous Solutions
Source: MDPI journal article supplement (doi:10.3390/colloids7010005), 2023-01-12
Supplement: s1 [file s1 › colloids-2074184-supplementary.pdf]

# Polyacrylic-co-maleic-acid-coated magnetite nanoparticles for enhanced removal of heavy metals from aqueous solutions

Rawan Mlih <sup>1,2,\*</sup>, Jonathan Suazo-Hernández <sup>3</sup>, Yan Liang <sup>4</sup>, Etelka Tombácz <sup>5</sup>, Roland Bol <sup>1,6</sup>, Erwin Klumpp <sup>1,\*</sup>

## Supplementary Materials

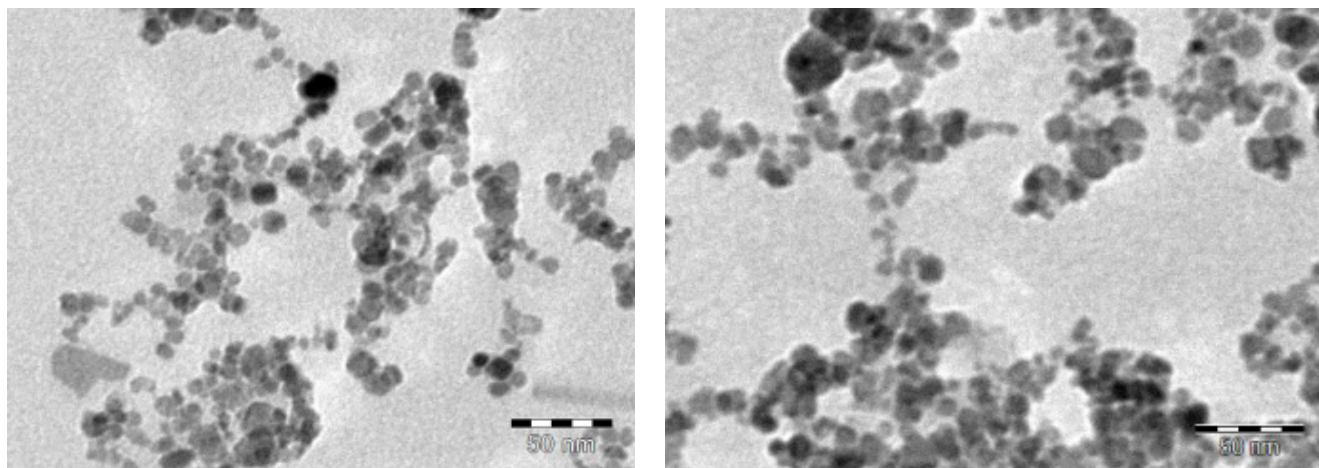

**Figure S1.** TEM images for (a) bare MNP and (b) PAM-coated MNPs.

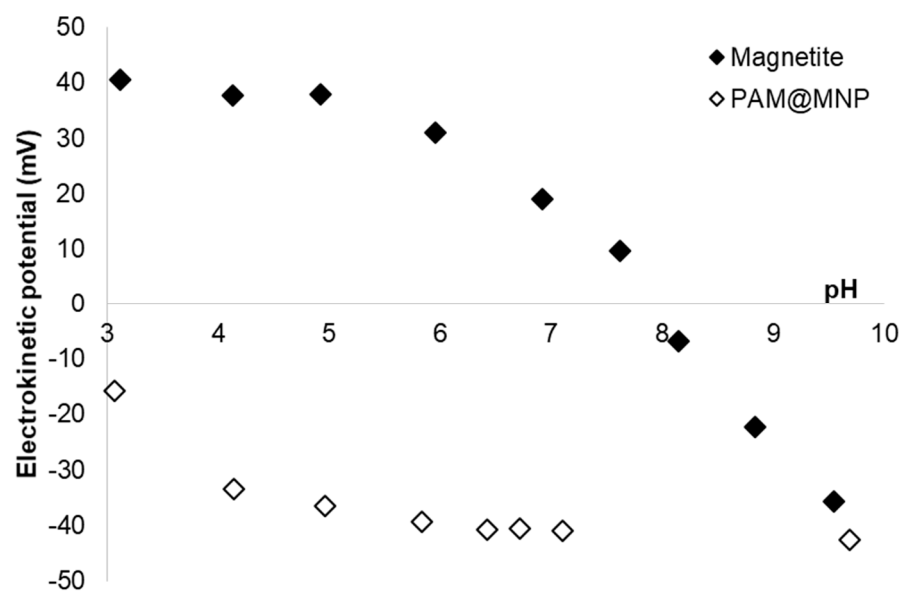

**Figure S2.** pH-dependent surface charging of bare and PAM-coated MNPs.
